# Supplementary material
Source: publisher site journal article supplement (https://www.dovepress.com/article/229646)
Supplement: Supplementary file 1 [file get_supplementary_file.php]

**Online supplementary file**

**Comparative performance of comorbidity measures in predicting health outcomes in patients with chronic obstructive pulmonary disease**

**METHODS**

**Table S1.** Description of the Charlson Index

**Table S2.** Description of the Elixhauser comorbidity measure

**Table S3.** Description of the CDS

**Table S4.** Description of the PBDI

**Table S5.** International Classification of Diseases, 9th Revision, Clinical Modification (ICD-9-CM) diagnosis used to identify outcomes of interest

**RESULTS**

**Table S6.** The cut-off points of probabilities of each outcome for different risk strata

**Table S7.** C-statistics of different comorbidity measures in relation to subsequent-year health outcomes, restricting to those with at least one inpatient or three outpatient COPD diagnoses

**Table S8.** C-statistics of different comorbidity measures in relation to subsequent-year health outcomes, restricting to those who did not die in the subsequent year

**Table S9.** Weights derived and applied for different health outcomes for the Elixhauser comrbidity measure

**Table S10.** C-statistics of the Elixhauser comorbidity measure and the PBDI that was modeled in different ways in relation to subsequent-year health outcomes

**Figure S1.** Flowchart of the study cohort assembly

**Table S1. Description of the Charlson Index**

| Disease categories | Weightsa | ICD-9-CM Codesb |
| --- | --- | --- |
| CV or cerebrovascular | | |
| Myocardial infarction | 1 | 410-410.9, 412 |
| Congestive heart failure | 1 | 428-428.9 |
| Peripheral vascular disease | 1 | 441-441.9, 443.9, 785.4, V43.4  Procedure code of 38.48 |
| Cerebrovascular disease | 1 | 430-438 |
| Endocrine | | |
| Diabetes | 1 | 250-250.3, 250.7 |
| Diabetes with chronic complications | 2 | 250.4-250.6 |
| Respiratory | | |
| Chronic pulmonary disease | 1 | 490-496, 500-505, 506.4 |
| Gastric or hepatological | | |
| Peptic ulcer disease | 1 | 531-534.9, 531.4-531.7, 532.4-532.7, 533.4-533.7, 534.4-534.7 |
| Mild liver disease | 1 | 571.2, 571.4-571.49, 571.5, 571.6 |
| Moderate or severe liver disease | 3 | 456.0-456.21, 572.2-572.8 |
| Renal | | |
| Renal disease | 2 | 582-582.9, 583-583.7, 585, 586, 588-588.9 |
| Neurological | | |
| Dementia | 1 | 290-290.9 |
| Hemiplegia or paraplegia | 2 | 342-342.9, 344.1 |
| Oncological | | |
| Any malignancy, including, leukemia ,lymphoma | 2 | 140-172.9, 174-195.8, 200-208.9 |
| Metastatic sold tumor | 6 | 196-199.1 |
| Rheumatologic | | |
| Rheumatologic disease | 1 | 710.0, 710.1, 710.4, 714.0-714.2, 714.81, 725 |
| Miscellaneous | | |
| AIDS | 6 | 042-044.9 |

AIDS, Acquired immunodeficiency syndrome; CV, cardiovascular; ICD-9-CM, International Classification of Diseases, 9th Revision, Clinical Modification.

aSee Charlson et al. J Chron Dis 1987;40(5):373-383.

bSee Deyo et al. J Clin Epidemiol 1992;45(6):613-619.

**Table S2. Description of the Elixhauser comorbidity measure**

| Disease categories | Weightsa | ICD-9-CM Codesb |
| --- | --- | --- |
| CV or cerebrovascular | | |
| Cardiac arrhythmias | 0.0645 | 426.10, 426.11, 426.13, 426.2-426.53, 426.6-426.89, 427.0, 427.2, 427.31, 427.60, 427.9, 785.0, V45.0, V53.3 |
| Valvular disease | -0.0964 | 093.20-093.24, 394.0-397.1, 424.0-424.91, 746.3-746.6, V42.2,V43.3 |
| Congestive heart failure | 0.5182 | 398.91, 402.11, 402.91, 404.11, 404.13, 404.91, 404.93, 428.0-428.9 |
| Pulmonary circulation disorders | 0.6359 | 416.0-416.9, 417.9 |
| Hypertension | -0.1647 | 401.1, 401.9, 402.10, 402.90, 404.10, 404.90, 405.11,  405.19, 405.91, 405.99 |
| Peripheral vascular disorders | -0.0814 | 440.0-440.9, 441.2, 441.4, 441.7, 441.9, 443.1-443.9, 447.1, 557.1, 557.9, V43.4 |
| Endocrine | | |
| Diabetes, uncomplicated | 0.2368 | 250.00-250.33 |
| Diabetes, complicated | 0.0867 | 250.40-250.73, 250.90-250.93 |
| Hypothyroidism | 0.0308 | 243-244.2, 244.8, 244.9 |
| Respiratory | | |
| Chronic pulmonary disease | 0.3764 | 490-492.8, 493.00-493.91, 494, 495.0-505, 506.4 |
| Gastric or hepatological | | |
| Peptic ulcer disease excluding bleeding | -0.1229 | 531.70, 531.90, 532.70, 532.90, 533.70, 533.90, 534.70, 534.90, V12.71 |
| Liver disease | 0.0428 | 070.32, 070.33, 070.54, 456.0, 456.1, 456.20, 456.21, 571.0, 571.2, 571.3, 571.40-571.49, 571.5, 571.6, 571.8, 571.9, 572.3, 572.8, V42.7 |
| Renal | | |
| Renal failure | 0.2980 | 403.11, 403.91, 404.12, 404.92, 585, 586, V42.0, V45.1, V56.0, V56.8 |
| Fluid and electrolyte disorders | 0.9264 | 276.0-276.9 |
| Neurological | | |
| Paralysis | 0.2778 | 342.0-342.12, 342.9-344.9 |
| Other neurological disorders | 0.6906 | 331.9, 332.0, 333.4, 333.5, 334.0-335.9, 340, 341.1-341.9, 345.00-345.11, 345.40-345.51, 345.80-345.91, 348.1, 348.3, 780.3, 784.3 |
| Psychological | | |
| Depression | -0.077 | 300.4, 301.12, 309.0, 309.1, 311 |
| Psychoses | 0.2304 | 295.00-298.9, 299.10-299.11 |
| Oncological | | |
| Solid tumor without metastasis | 0.6020 | 140.0-172.9, 174.0-175.9, 179-195.8, V10.00-V10.9 |
| Lymphoma | 0.6643 | 200.00-202.38, 202.50-203.01, 203.8-203.81, 238.6, 273.3, V10.71, V10.72, V10.79 |
| Metastatic cancer | 2.0626 | 196.0-199.1 |
| Rheumatologic | | |
| Rheumatoid arthritis/collagen vascular diseases | -0.1476 | 701.0, 710.0-710.9, 714.0-714.9, 720.0-720.9, 725 |
| Miscellaneous | | |
| Coagulopathy | 0.5261 | 286.0-286.9, 287.1, 287.3-287.5 |
| Blood loss anemia | 0.5431 | 280.0 |
| Deficiency anemias | 0.5649 | 280.1-281.9, 285.9 |
| Weight loss | 0.9362 | 260-263.9 |
| Obesity | -0.1470 | 278.0 |
| Alcohol abuse | 1.2300 | 291.1, 291.2, 291.5, 291.8, 291.9, 303.90-303.93, 305.00-305.03, V113 |
| Drug abuse | 0.5613 | 292.0, 292.82-292.89, 292.9, 304.00-304.93, 305.20-305.93 |
| AIDS | 1.0772 | 042-044.9 |

AIDS, Acquired immunodeficiency syndrome;CV, cardiovascular; ICD-9-CM, International Classification of Diseases, 9th Revision, Clinical Modification.

aThe weights were derived based on the outcome of overall death in the training dataset of the current population.

bSee Elixhauser et al. Med Care 1998;36(1):8-27.

**Table S3. Description of the CDS**

| Disease categories | Weightsa | ATC codesa,b |
| --- | --- | --- |
| CV or cerebrovascular | | |
| Cardiac disease | 789.1 | C01AA, C01BA-BD, C01BG , C01CA07, C01CE, C01CX, C01DA, C01DX16, C01EB10, C03CA-CC, C03CX, C03EB |
| Heart disease / hypertension | 789.1 | C02AA -AC, C02BA-BB, C02CA, C02CC, C02DA-DD, C02DG, C02KA-KD, C02KX, C02LA-LC, C02LE-LG, C02LK-LL, C02LX, C03AA-AB, C03AH, C03AX, C03BA-BD, C03BX, C03DA-DB, C03EA, C03XA, C09AA, C09BA-BB, C09CA, C09DA-DB |
| Hypertension | 64.3 | C07AA-AB, C07AG, C07BA-BB, C07BG, C07CA-CB, C07CG, C07DA-DB, C07FA-FB, C08CA, C08CX, C08DA-DB, C08EA, C08EX, C08GA |
| Coronary / peripheral vascular disease | 1932.3 | B01AA-AB, B01AC (except 06, 08, 15), B01AD-AE, B01AX, C04AD03 |
| Hyperlipidemia | 293.4 | C10AA-AD, C10AX, C10BA, C10BX |
| Endocrine | | |
| Diabetes | 1108.4 | A10AB-AF, A10BA-BD, A10BF-BH, A10BX, A10XA |
| Thyroid disorders | 282.8 | H03AA, H03BA-BB |
| Respiratory | | |
| Respiratory illness, asthma | 561.2 | R03AC, R03AK, R03BA-BC, R03BX, R03CC, R03DA-DC, R03DX |
| Tuberculosis | 5109.8 | J01GA01, J01GB04, J04AA-AD, J04AK, J04AM |
| Cystic fibrosisc | NA | NA |
| Gastric or hepatological | | |
| Acid peptic disease | 797.1 | A02BA-BD, A02BX02 |
| Crohn’s and ulcerative colitis | 614.7 | A07EC |
| Liver failure | 1519.1 | A06AD11, H01BA01, H01BA04, H01BA06, H01CB01-02 |
| Renal | | |
| Renal disease | 16579.0 | A11CC, V03AE |
| End stage renal disease | 2192.8 | B03XA |
| Neurological | | |
| Epilepsy | 771.5 | N03AA-AG, N03AX |
| Parkinson’s disease | 2114.4 | N04BA-BD, N04BX |
| Psychological | | |
| Anxiety and tension | 480.0 | N05BA-BE, N05BX |
| Depression | 545.4 | N06AA-AB, N06AF-AG, N06AX |
| Psychotic illness | 1438.7 | N05AA-N05AH, N05AL, N05AX |
| Bipolar disorders | 260.1 | N05AN01 |
| Oncological | | |
| Malignancies | 1940.2 | L01AA-AD, L01AG, L01AX, L01BA-BC, L01CA-CD, L01CX, L01DA-DC, L01XA-XE, L01XX-XY, L03AA, L03AC, A04AA |
| Pain | 633.2 | N02AA-AG, N02AX |
| Rheumatologic | | |
| Rheumatologic conditions | 1199.6 | H02AB, H02BX, L04AA13, L04AA24, L04AB, L04AC03, L04AC07, M01CB, M01CC01, P01BA02 |
| Miscellaneous | | |
| Pain and inflammation | 137.6 | M01AA-AC, M01AE, M01AG-AH, M01AX |
| Gout | 833.8 | M04AA-AC, M04AX |
| Transplantation | 3411.6 | L04AA02-04, L04AA06, L04AA10, L04AA18-19, L04AC01-02, L04AD, L04AX01 |
| Glaucoma | 351.7 | S01EA, S01EB (except 06), S01EC-EE |
| HIV | 4853.2 | J05AE, J05AF01-04, J05AF06-07, J05AF09, J05AG, J05AR, J05AX07- 09 |

ATC, Anatomical Therapeutic Chemical; CDS, chronic disease score; CV, cardiovascular; HIV, human immunodeficiency virus; NA, not applicable.

aSee Clark et al. Med Care 1995;33(8):783-795.

bThe original drug codes were built up according to the American Hospital Formulary System (AHFS) Pharmacologic-Therapeutic Classification system. Our previous work created an AHFS-ATC mapping list, which facilitates the use of updated CDS outside the US area. See Dong et al. Pharmacotherapy 2013;33(2):126-136.

cInformation on the category of cystic fibrosis did not include in the current study because of exceedingly low prevalence in Asia and in Taiwan.

**Table S4. Description of the PBDI**

| Drug categories | Weightsa | ATC codesa |
| --- | --- | --- |
| CV or cerebrovascular | | |
| Antiarrhythmics | 0.08 | C01BA-BD, C01BG , C01EB10 |
| Cardiac stimulants | -0.48 | C01CA07, C01CE, C01CX |
| Digitalis glycosides | 0.19 | C01AA |
| High-ceiling diuretics | 0.47 | C03CA-CC, C03CX , C03EB |
| Organic nitrates and other vasodilators | 0.25 | C01DA, C01DX16 |
| β-Blockers | 0.03 | C07AA-AB, C07AG, C07BA-BB, C07BG, C07CA-CB, C07CG, C07DA-DB, C07FA-FB |
| Calcium channel blockers | 0.17 | C08CA, C08CX, C08DA-DB, C08EA, C08EX, C08GA |
| ACE inhibitors and angiotensin II receptor blockers | 0.04 | C09AA, C09BA-BB, C09CA, C09DA-DB |
| Antihypertensives and non-high-ceiling diuretics | 0.12 | C02AA -AC, C02BA-BB, C02CA, C02CC, C02DA-DD, C02DG, C02KA-KD, C02KX, C02LA-LC, C02LE-LG, C02LK-LL, C02LX, C03AA-AB, C03AH, C03AX, C03BA-BD, C03BX, C03DA-DB, C03EA, C03XA |
| Antiplatelet agents | 0.20 | B01AC (except 06, 08, 15), C04AD03 |
| Anticoagulants | 0.28 | B01AA-AB, B01AD-AE, B01AX |
| Lipid-modifying agents | -0.06 | C10AA-AD, C10AX, C10BA, C10BX |
| Endocrine | | |
| Drug for diabetes mellitus | 0.46 | A10AB-AF, A10BA-BD, A10BF-BH, A10BX, A10XA |
| Thyroid and antithyroid preparations | 0.12 | H03AA, H03BA-BB |
| Respiratory | | |
| Drugs for obstructive airway diseases | 0.09 | R03AC, R03AK, R03BA-BC, R03BX, R03CC, R03DA-DC, R03DX |
| Drugs for treatment of tuberculosis | 0.32 | J01GA01, J01GB04, J04AA-AD, J04AK, J04AM |
| Gastric or hepatological | | |
| Drugs for peptic ulcer and GERD | 0.14 | A02BA-BD, A02BX02 |
| Intestinal antiinflammatory agents | -0.13 | A07EC |
| Drugs for chronic viral hepatitis | 0.38 | J05AB04, J05AF05, J05AF08, J05AF10-12, L03AB04-05, L03AB09-11 |
| Drugs for liver failure | 0.83 | A06AD11, H01BA01, H01BA04, H01BA06, H01CB01-02 |
| Renal | | |
| Drugs for renal disease | 0.11 | V03AE, A11CC |
| Erythropoetins | 1.02 | B03XA |
| Neurological | | |
| Antiepileptics | 0.40 | N03AA-AG, N03AX |
| Antiparkinson drugs | 0.12 | N04BA-BD, N04BX |
| Psychological | | |
| Anxiolytics | 0.14 | N05BA-BE, N05BX |
| Antidepressants | 0.23 | N06AA-AB, N06AF-AG, N06AX |
| Antipsychotics | 0.40 | N05AA-N05AH, N05AL, N05AX |
| Lithium | 0.85 | N05AN01 |
| Oncological | | |
| Chemotherapeutic drugs | 1.22 | L01AA-AD, L01AG, L01AX, L01BA-BC, L01CA-CD, L01CX, L01DA-DC, L01XA-XE, L01XX-XY, L03AA, L03AC, A04AA |
| Opioids | 0.58 | N02AA-AG, N02AX |
| Rheumatologic | | |
| Antirheumatic agents | -0.11 | L04AA13, L04AA24, L04AB, L04AC03, L04AC07, M01CB, M01CC01, P01BA02 |
| Miscellaneous | | |
| Glucocorticosteroids | 0.15 | H02AB, H02BX |
| NSAIDs | 0.15 | M01AA-AC, M01AE, M01AG-AH, M01AX |
| Antigout preparations | 0.17 | M04AA-AC, M04AX |
| Immunosuppressants for transplantation | 0.71 | L04AA02-04, L04AA06, L04AA10, L04AA18-19, L04AC01-02, L04AD, L04AX01 |
| Antiglaucoma preparations and miotics | 0.05 | S01EA, S01EB (except 06), S01EC-EE |
| Antivirals for treatment of HIV infections | 0.71 | J05AE, J05AF01-04, J05AF06-07, J05AF09, J05AG, J05AX07- 09, J05AR |

ACE, angiotensin converting enzyme; ATC, Anatomical Therapeutic Chemical; CV, cardiovascular; GERD, gastro-esophageal reflux disease; HIV, human immunodeficiency virus; NSAIDs, non-steroidal anti-inflammatory drugs; PBDI, pharmacy-based disease indicators.

aSee Dong et al. Pharmacotherapy 2013;33(2):126-136.

**Table S5.** International Classification of Diseases, 9th Revision, Clinical Modification (ICD-9-CM) diagnosis used to identify outcomes of interest

| Cause of hospitalization | ICD-CM diagnosis codes |
| --- | --- |
| Cardiovascular disease | 410-414, 425-428 |
| Cerebrovascular disease | 430-438 |
| Respiratory disease | 466, 480-488, 490-496, 500-508, 518.8 |

**Table S6.** The cut-off points of probabilities of each outcome for different risk strata

| Outcome | Very low | Low | Intermediate | High |
| --- | --- | --- | --- | --- |
| Overall death | < 0.01 | > 0.01 to < 0.03 | > 0.03 to < 0.075 | > 0.075 |
| Overall hospitalization | < 0.1 | > 0.1 to < 0.2 | > 0.2 to < 0.3 | > 0.3 |
| Hospitalization due to CV disease | < 0.025 | > 0.025 to < 0.05 | > 0.05 to < 0.075 | > 0.075 |
| Hospitalization due to cerebrovascular disease | < 0.015 | > 0.015 to < 0.03 | > 0.03 to < 0.045 | > 0.045 |
| Hospitalization due to respiratory disease | < 0.05 | > 0.05 to < 0.1 | > 0.1 to < 0.15 | > 0.15 |
| Hospitalization due to other reasons | < 0.06 | > 0.06 to < 0.07 | > 0.07 to < 0.08 | > 0.08 |

CV, cardiovascular.

**Table S7.** C-statistics of different comorbidity measures in relation to subsequent-year health outcomes, restricting to those with at least one inpatient or three outpatient COPD diagnoses

|  | **Training dataset (n=109,042)** | | | | | | |
| --- | --- | --- | --- | --- | --- | --- | --- |
|  |  |  | Hospitalization due to | | | | |
| Comorbidity measure | Overall  death | Overall hospitalization | CV diseases | | Cerebro –  vascular  diseases | Respiratory diseases | Other reasons |
| Referencea | 0.729  (0.724,0.734) | 0.630  (0.627,0.634) | 0.663  (0.657,0.668) | | 0.646  (0.639,0.653) | 0.671  (0.667,0.675) | 0.539  (0.533,0.545) |
| Deyo version of Charlson Index | 0.773  (0.768,0.778) | 0.683  (0.679,0.686) | 0.700  (0.695,0.704) | | 0.694  (0.687,0.701) | 0.702  (0.698,0.706) | 0.576  (0.570,0.583) |
| Elixhauser comorbidity measure | 0.795  (0.790,0.799) | 0.701  (0.698,0.704) | 0.759  (0.755,0.764) | | 0.724  (0.717,0.731) | 0.734  (0.731,0.738) | 0.629  (0.622,0.635) |
| Updated CDS | 0.771  (0.766,0.775) | 0.688  (0.685,0.691) | 0.716  (0.712,0.721) | | 0.676  (0.669,0.683) | 0.709  (0.705,0.712) | 0.560  (0.553,0.566) |
| PBDI | 0.782  (0.777,0.787) | 0.706  (0.702,0.709) | 0.736  (0.731,0.740) | | 0.680  (0.673,0.687) | 0.721  (0.717,0.725) | 0.585  (0.579,0.592) |
|  | **Validation dataset (n=109,042)** | | | | | | |
|  |  |  | | Hospitalization due to | | | |
| Comorbidity measure | Overall  death | Overall hospitalization | CV diseases | | Cerebro –  vascular  diseases | Respiratory diseases | Other reasons |
| Referencea | 0.727  (0.722,0.733) | 0.631  (0.627,0.634) | 0.662  (0.657,0.667) | | 0.649  (0.642,0.656) | 0.669  (0.665,0.673) | 0.534  (0.527,0.540) |
| Deyo version of Charlson Index | 0.771  (0.766,0.776) | 0.682  (0.678,0.685) | 0.702  (0.697,0.707) | | 0.694  (0.687,0.701) | 0.700  (0.696,0.703) | 0.573  (0.566,0.579) |
| Elixhauser comorbidity measure | 0.795  (0.791,0.800) | 0.700  (0.696,0.703) | 0.761  (0.756,0.765) | | 0.722  (0.715,0.729) | 0.734  (0.730,0.737) | 0.621  (0.614,0.627) |
| Updated CDS | 0.770  (0.765,0.775) | 0.688  (0.685,0.691) | 0.719  (0.714,0.724) | | 0.676  (0.669,0.684) | 0.707  (0.703,0.711) | 0.554  (0.548,0.561) |
| PBDI | 0.783  (0.778,0.787) | 0.706  (0.702,0.709) | 0.742  (0.737,0.747) | | 0.682  (0.675,0.689) | 0.720  (0.716,0.723) | 0.580  (0.573,0.586) |

CDS, chronic disease score; COPD, chronic obstructive pulmonary disease; CV, cardiovascular; PBDI, pharmacy-based disease indicator.

aA model including age and sex only as predictors.

**Table S8.** C-statistics of different comorbidity measures in relation to subsequent-year health outcomes, restricting to those who did not die in the subsequent year

|  | **Training dataset (n=201,659)** | | | | |
| --- | --- | --- | --- | --- | --- |
|  |  | Hospitalization due to | | | |
| Comorbidity measure | Overall hospitalization | CV diseases | Cerebro –  vascular  diseases | Respiratory diseases | Other reasons |
| Referencea | 0.642  (0.639,0.645) | 0.697  (0.692,0.701) | 0.698  (0.691,0.704) | 0.702  (0.698,0.705) | 0.526  (0.521,0.530) |
| Deyo version of Charlson Index | 0.691  (0.688,0.694) | 0.741  (0.737,0.745) | 0.743  (0.737,0.749) | 0.733  (0.730,0.737) | 0.575  (0.570,0.580) |
| Elixhauser comorbidity measure | 0.707  (0.704,0.709) | 0.788  (0.784,0.792) | 0.766  (0.760,0.772) | 0.773  (0.770,0.776) | 0.618  (0.614,0.623) |
| Updated CDS | 0.700  (0.698,0.703) | 0.758  (0.754,0.762) | 0.729  (0.723,0.735) | 0.738  (0.734,0.741) | 0.586  (0.581,0.590) |
| PBDI | 0.716  (0.713,0.719) | 0.778  (0.774,0.782) | 0.736  (0.730,0.742) | 0.750  (0.746,0.753) | 0.607  (0.602,0.611) |
|  | **Validation dataset (n=201,658)** | | | | |
|  |  |  | Hospitalization due to | | |
| Comorbidity measure | Overall hospitalization | CV diseases | Cerebro –  vascular  diseases | Respiratory diseases | Other reasons |
| Referencea | 0.639  (0.636,0.642) | 0.695  (0.690,0.699) | 0.697  (0.691,0.704) | 0.703  (0.700,0.707) | 0.521  (0.516,0.525) |
| Deyo version of Charlson Index | 0.688  (0.685,0.691) | 0.738  (0.734,0.742) | 0.748  (0.742,0.753) | 0.734  (0.731,0.738) | 0.572  (0.567,0.577) |
| Elixhauser comorbidity measure | 0.704  (0.701,0.707) | 0.785  (0.781,0.789) | 0.766  (0.761,0.772) | 0.775  (0.772,0.778) | 0.619  (0.614,0.623) |
| Updated CDS | 0.698  (0.695,0.701) | 0.754  (0.750,0.758) | 0.728  (0.722,0.734) | 0.738  (0.735,0.742) | 0.584  (0.579,0.588) |
| PBDI | 0.714  (0.711,0.716) | 0.774  (0.770,0.778) | 0.737  (0.731,0.743) | 0.751  (0.747,0.754) | 0.604  (0.599,0.608) |

CDS, chronic disease score; CV, cardiovascular; PBDI, pharmacy-based disease indicator.

aA model including age and sex only as predictors.

**Table S9.** Weights derived and applied for different health outcomes for the Elixhauser comrbidity measure

|  |  |  | | Hospitalization due to | | | | | | |
| --- | --- | --- | --- | --- | --- | --- | --- | --- | --- | --- |
| Disease categories | Overall  death | Overall hospitalization | | CV diseases | | Cerebro –  vascular  diseases | | Respiratory diseases | | Other reasons |
| CV or cerebrovascular | | | | | | | | | | |
| Cardiac arrhythmias | 0.0645 | 0.1342 | | 0.7651 | | 0.1309 | | 0.0766 | | -0.1971 |
| Valvular disease | -0.0964 | 0.1005 | | 0.4026 | | -0.1712 | | -0.0043 | | 0.0266 |
| Congestive heart failure | 0.5182 | 0.4761 | | 1.1414 | | 0.1827 | | 0.5048 | | -0.2769 |
| Pulmonary circulation disorders | 0.6359 | 0.6723 | | 0.5030 | | -0.0853 | | 0.9766 | | -0.6016 |
| Hypertension | -0.1647 | 0.1526 | | 0.2667 | | 0.4562 | | 0.0336 | | 0.1622 |
| Peripheral vascular disorders | -0.0814 | 0.0257 | | 0.0915 | | 0.0337 | | -0.0951 | | 0.1408 |
| Endocrine | | | | | | | | | | |
| Diabetes, uncomplicated | 0.2368 | 0.2460 | 0.2695 | | 0.2294 | | 0.2177 | | 0.1571 | |
| Diabetes, complicated | 0.0867 | 0.1560 | 0.1827 | | 0.0496 | | -0.0006 | | 0.1981 | |
| Hypothyroidism | 0.0308 | 0.1772 | 0.2754 | | 0.1126 | | 0.1157 | | 0.1046 | |
| Respiratory | | | | | | | | | | |
| Chronic pulmonary disease | 0.3764 | 0.3435 | 0.2838 | | 0.2656 | | 0.9897 | | -0.2523 | |
| Gastric or hepatological | | | | | | | | | | |
| Peptic ulcer disease excluding bleeding | -0.1229 | 0.1688 | 0.1086 | | 0.0025 | | 0.0511 | | 0.2224 | |
| Liver disease | 0.0428 | 0.1435 | -0.0946 | | -0.1633 | | -0.0491 | | 0.3642 | |
| Renal | | | | | | | | | | |
| Renal failure | 0.2980 | 0.3648 | 0.4076 | | 0.0145 | | 0.1758 | | 0.2928 | |
| Fluid and electrolyte disorders | 0.9264 | 0.8791 | 0.4845 | | 0.6943 | | 1.0450 | | -0.046 | |
| Neurological | | | | | | | | | | |
| Paralysis | 0.2778 | 0.4785 | 0.1594 | | 1.3177 | | 0.4832 | | 0.0908 | |
| Other neurological disorders | 0.6906 | 0.6538 | 0.1773 | | 1.0003 | | 0.7923 | | 0.0250 | |
| Psychological | | | | | | | | | | |
| Depression | -0.077 | 0.1819 | 0.1252 | | 0.0602 | | 0.0385 | | 0.2398 | |
| Psychoses | 0.2304 | 0.4802 | 0.1522 | | 0.1663 | | 0.3949 | | 0.4501 | |
| Malignant | | | | | | | | | | |
| Solid tumor without metastasis | 0.6020 | 0.5025 | 0.0422 | | -0.1061 | | 0.2569 | | 0.6360 | |
| Lymphoma | 0.6643 | 0.5110 | 0.3049 | | 0.1371 | | 0.4599 | | 0.2664 | |
| Metastatic caner | 2.0626 | 1.1828 | -0.0836 | | -0.2761 | | 0.8043 | | 0.8479 | |
| Rheumatologic | | | | | | | | | | |
| Rheumatoid arthritis/collagen vascular diseases | -0.1476 | 0.1807 | 0.0954 | | -0.2590 | | -0.0124 | | 0.3399 | |
| Miscellaneous | | | | | | | | | | |
| Coagulopathy | 0.5261 | 0.4522 | 0.2988 | | -0.1983 | | 0.2704 | | 0.4125 | |
| Blood loss anemia | 0.5431 | 0.4556 | 0.1559 | | 0.0314 | | 0.2384 | | 0.3770 | |
| Deficiency anemias | 0.5649 | 0.3262 | 0.1570 | | 0.2309 | | 0.2842 | | 0.153 | |
| Weight loss | 0.9362 | 0.5000 | 0.1965 | | 0.6299 | | 0.7338 | | -0.3997 | |
| Obesity | -0.1470 | 0.1094 | 0.4022 | | -0.0889 | | 0.2597 | | -0.1039 | |
| Alcohol abuse | 1.2300 | 1.0617 | 0.3376 | | 0.1181 | | 0.7415 | | 0.9978 | |
| Drug Abuse | 0.5613 | 0.6227 | 0.5793 | | 0.3667 | | 0.5146 | | 0.4199 | |
| AIDS | 1.0772 | 0.3644 | -0.3983 | | -0.7307 | | 0.7393 | | 0.1072 | |

AIDS, Acquired immunodeficiency syndrome; CV, cardiovascular.

**Table S10.** C-statistics of the Elixhauser comorbidity measure and the PBDI that was modeled in different ways in relation to subsequent-year health outcomes

|  |  | **Training dataset (n=214,126)** | | | | | |
| --- | --- | --- | --- | --- | --- | --- | --- |
|  |  |  |  | Hospitalization due to | | | |
| Comorbidity measure | Model | Overall  death | Overall hospitalization | CV diseases | Cerebro –  vascular  diseases | Respiratory diseases | Other reasons |
| Elixhauser comorbidity measure | Age+Sex+30 Elixhauser indicators | 0.834  (0.831,0.838) | 0.727  (0.725,0.730) | 0.793  (0.790,0.797) | 0.765  (0.760,0.770) | 0.789  (0.786,0.791) | 0.623  (0.618,0.627) |
| PBDI | Age+Sex+PBDI score | 0.822  (0.819,0.826) | 0.733  (0.731,0.735) | 0.780  (0.777,0.783) | 0.734  (0.729,0.739) | 0.768  (0.765,0.771) | 0.600  (0.596,0.605) |
| PBDI | Age+Sex+37 PBDI indicators | 0.849  (0.846,0.853) | 0.740  (0.737,0.742) | 0.809  (0.806,0.813) | 0.767  (0.762,0.772) | 0.802  (0.800,0.805) | 0.631  (0.627,0.635) |
|  |  | **Validation dataset (n=214,125)** | | | | | |
|  |  |  |  | Hospitalization due to | | | |
| Comorbidity measure | Model | Overall  death | Overall hospitalization | CV diseases | Cerebro –  vascular  diseases | Respiratory diseases | Other reasons |
| Elixhauser comorbidity measure | Age+Sex+30 Elixhauser indicators | 0.832  (0.829,0.836) | 0.724  (0.722,0.726) | 0.792  (0.789,0.796) | 0.760  (0.755,0.765) | 0.787  (0.785,0.790) | 0.621  (0.617,0.625) |
| PBDI | Age+Sex+PBDI score | 0.822  (0.819,0.826) | 0.730  (0.728,0.733) | 0.776  (0.773,0.780) | 0.731  (0.726,0.736) | 0.769  (0.766,0.771) | 0.598  (0.593,0.602) |
| PBDI | Age+Sex+37 PBDI indicators | 0.849  (0.846,0.852) | 0.737  (0.734,0.739) | 0.808  (0.805,0.812) | 0.762  (0.757,0.767) | 0.800  (0.798,0.803) | 0.626  (0.621,0.630) |

CDS, chronic disease score; CV, cardiovascular; PBDI, pharmacy-based disease indicator.

**Figure S1.** Flowchart of the study cohort assembly

| Patients had at least one COPD diagnosis in 2013 in the National Health Insurance Database (n=562,791) | |  |  |
| --- | --- | --- | --- |
|  |  |  |  |
|  |  | Excluded due to:   - Patients with age < 40 or >100 years or undetermined in 2013 (n=72,226) - Patients with undetermined gender (n=1,168) - Patients who died in 2013 or 2014 (n=30736) | |
|  |
|  |  |  |  |
| Eligible patients included in the analysis (n = 428,251) | |  |  |

COPD, chronic obstructive pulmonary disease.
